# Supplementary material for: Structural basis of ferroportin inhibition by minihepcidin PR73
Source: PubMed Central journal article supplement (PMC9882908; doi:10.1371/journal.pbio.3001936), 2023-01-17

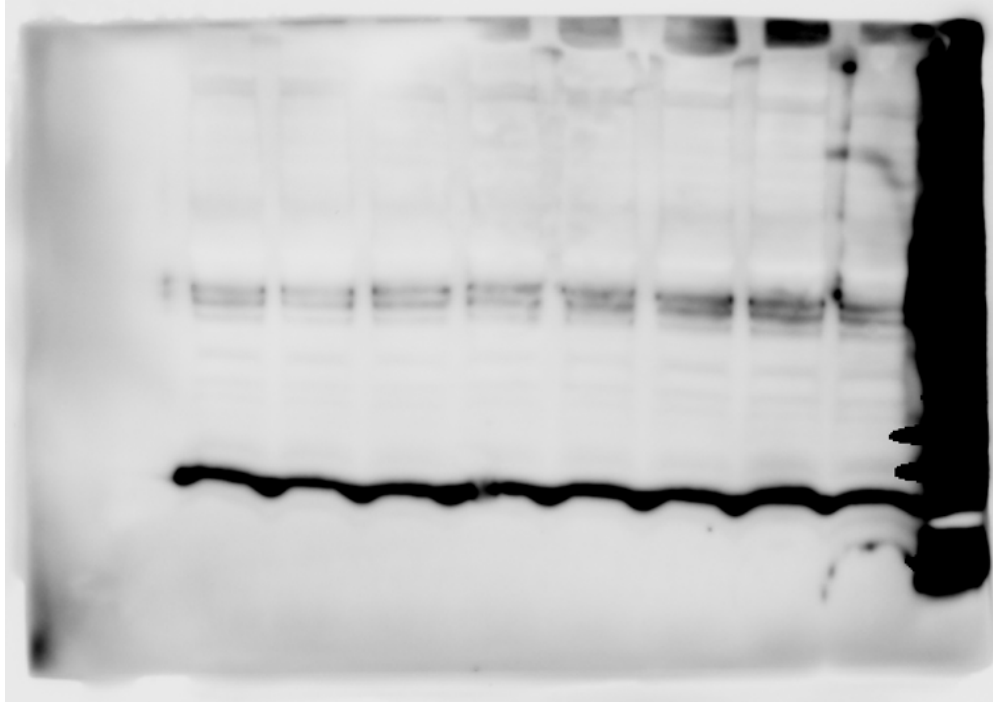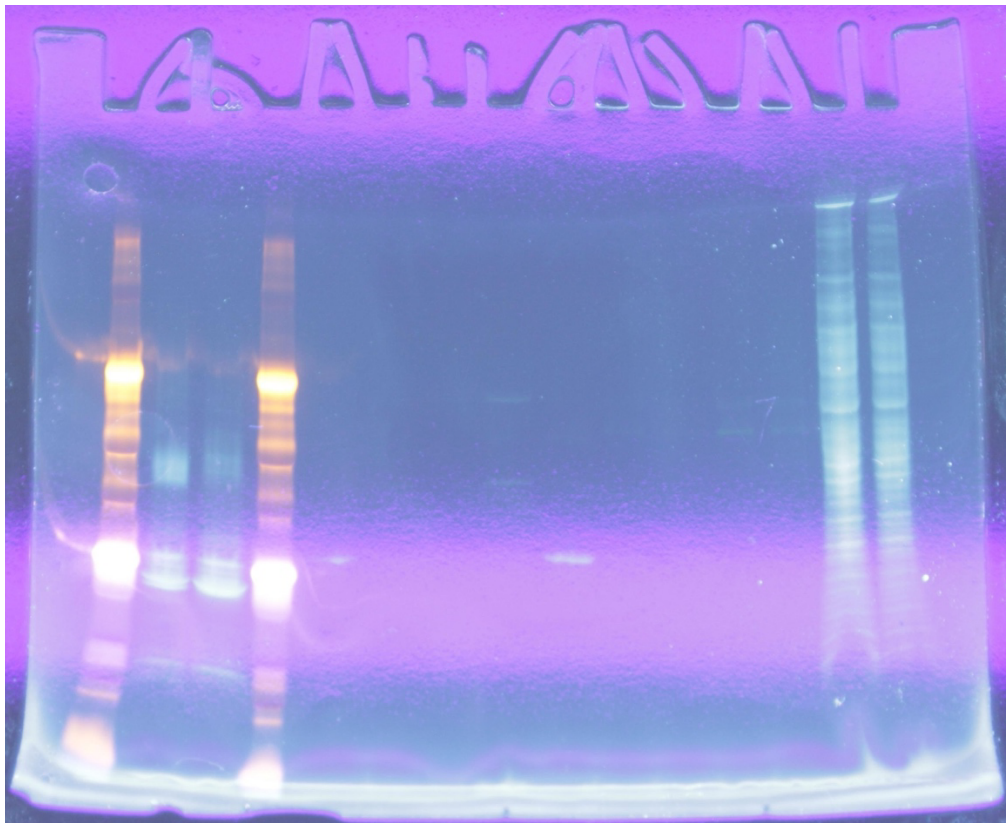

Supplement: pbio.3001936.s015.pdf [file pbio.3001936.s015.pdf]
